# Supplementary material for: FYN-TRAF3IP2 and KHDRBS1-LCK hijack T cell receptor signaling in peripheral T cell lymphoma, not otherwise specified
Source: Research Square preprint supplement (doi:10.21203/rs.3.rs-200114/v1), 2021-02-05
Supplement: Supplementary file 1 [file 0f98d89f16b91ce2f84d2d64.xlsx]

## Sheet: Supplementary table 2
FYN-TRAF3IP2	Sample ID	DIAGNOSIS		CD3	CD4	CD8	CD30	ICOS	PD1	CXCL13	Bcl6	CD10	PERF	TiA1	GrzB
	T087	PTCL NOS	non TFH non cytotoxic	0	3	0	3	0	0	0	0	0	0	0	0
	T442	PTCL NOS	non TFH	3	0	0	2	3	0	0	0	0	ND	ND	ND
	T868	PTCL NOS	cytotox	3	3	0	1	ND	ND	ND	ND	ND	1	3	1
	T1180	PTCL NOS	unspecified	3	3	0	0	ND	3	ND	ND	ND	0	0	0
	T430	PTCL NOS	cytotox	3	0	3	1	0	ND	0	0	0	ND	2	0
	T017	PTCL NOS	unspecified	3	3	0	0	0	NI	NI	0	0	ND	0	ND
	T1091	PTCL NOS	unspecified	3	3	0	1	0	NI	0	3	0	ND	ND	0
	T465	PTCL NOS	unspecified	3	3	0	0	3	NI	0	0	0	1	ND	0
	T025	PTCL NOS	unspecified	3	3	0	2	ND	0	0	3	0	0	0	ND
	T026	PTCL NOS	unspecified	3	ND	0	1	ND	ND	ND	ND	ND	ND	ND	ND
	T425	PTCL NOS	TFH	3	ND	ND	NI	3	NI	0	1	0	ND	ND	ND
	T514	PTCL NOS	TFH	3	3	0	2	3	NI	0	2	0	ND	ND	ND
	T376	PTCL NOS	unspecified	3	3	0	ND	3	NI	NI	NI	0	0	0	ND
	T493	PTCL NOS	unspecified	3	3	0	ND	ND	2	ND	ND	ND	ND	ND	ND
	T513	PTCL NOS	TFH	3	ND	ND	ND	1	0	NI	0	1	ND	ND	ND
yes	T028	PTCL NOS	cytotox	3	3	0	0	ND	ND	NI	NI	NI	0	2	0
yes	T051	PTCL NOS	TFH	3	ND	0	ND	ND	3	1	ND	1	ND	0	0
	T117	PTCL NOS	unspecified	1	ND	0	0	0	0	NI	NI	NI	0	0	0
yes	T286	PTCL NOS	TFH	3	3	0	ND	3	0	1	0	0	ND	ND	ND
	T309	PTCL NOS	unspecified	3	2	0	0	0	NI	NI	NI	0	ND	0	0
	T326	PTCL NOS	cytotox	3	ND	0	1	3	0	0	0	0	0	3	0
yes	T402	PTCL NOS	cytotox	2	0	0	0	ND	0	0	0	ND	2	0	3
	T423	PTCL NOS	cytotox	2	0	2	0	ND	NI	ND	ND	ND	2	2	2
yes	T499	PTCL NOS	unspecified (but RHOAG17V)	3	3	0	1	ND	ND	ND	ND	ND	0	ND	0
	T543	ATLL		3	3	0	0	0	ND	1	NI	NI	ND	0	ND
	T594	PTCL NOS	cytotox	3	0	3	2	ND	0	0	1	0	3	3	ND
	T019	PTCL NOS	unspecified	2	0	0	3	0	0	0	0	0	0	0	0
	T079	PTCL NOS	cytotox	0	3	0	1	0	0	0	0	0	3	3	ND
yes	T080	PTCL NOS	cytotox	3	0	3	3	0	ND	ND	ND	0	3	3	3
	T083	PTCL NOS	cytotox	0	3	0	3	0	ND	ND	ND	ND	3	3	ND
	T103	PTCL NOS	unspecified	2	NI	0	3	3	NI	0	0	0	0	0	0
	T149	PTCL NOS	cytotox	3	NI	3	3	ND	1	ND	0	0	ND	1	ND
	T150	PTCL NOS	cytotox	3	0	3	0	ND	ND	0	ND	0	ND	3	3
	T153	PTCL NOS	unspecified	3	ND	ND	0	3	0	0	ND	0	0	0	ND
	T173	PTCL NOS	unspecified	0	ND	3	3	ND	0	ND	ND	1	ND	ND	ND
	T177	PTCL NOS	unspecified	3	3	0	3	0	0	0	0	0	ND	0	0
	T306	PTCL NOS	unspecified	0	2	0	2	ND	ND	ND	ND	0	0	0	1
Legend	Grading
Negative
Positive	1: weak
	2: moderate
	3: strong
