# Supplementary material for: FYN-TRAF3IP2 and KHDRBS1-LCK hijack T cell receptor signaling in peripheral T cell lymphoma, not otherwise specified
Source: Research Square preprint supplement (doi:10.21203/rs.3.rs-200114/v1), 2021-02-05
Supplement: Supplementary file 2 [file 34926cc50dbcb57adb3659a1.docx]

**Supplemental information**

**SUPPLEMENTARY FIGURE LEGENDS**

**Supplementary Figure 1**

Characterization of PTCL-NOS and PTCL-TFH cases. **a** Expression of Tfh markers in PTCL-NOS (PTCL), PTCL-TFH and ALCL cases and normal lymph nodes (LN). Blue dots represent the cases with a *FYN-TRAF3IP2* gene fusion. The orange dot represents the case with a *KHDRBS1-LCK* gene fusion. **b** Expression of *TNFRSF8*, *BATF3* and *TMOD1* in PTCL-NOS (PTCL), PTCL-TFH and ALCL cases and normal lymph nodes (LN). Blue dots represent the cases with a *FYN-TRAF3IP2* gene fusion. The orange dot represents the case with a *KHDRBS1-LCK* gene fusion. **c** Sanger sequencing of the RT-PCR amplicon for the *SIN3A-FOXO1* fusion in case PTCL14. **d** Gel separation pictures of the RT-PCR amplicons for the *FYN-TRAF3IP2* fusion transcript and *CIZ* control reaction for the validation cohort. **e** Sanger sequencing of the RT-PCR amplicons from the positive RT-PCR reactions for the *FYN-TRAF3IP2* fusion transcript in the validation cohort.

**Supplementary Figure 2**

Expression of pMIG constructs in Ba/F3 cells and expression of IL-17 signaling components in clinical samples. **a** Western blot for TRAF3IP2 and FYN in transduced Ba/F3 cells. **b** Expression of *IL17RC* in various cells from lymphoid and myeloid lineages from healthy volunteers. Data from DICE database. Dashed lines represent the median and dotted lines represent the lower and upper quartiles in the violin plots. **c** Expression levels of *IL17A* and *IL17F* compared to expression levels of *IL21* and *IL6* in normal lymph nodes (LN), PTCL-TFH, PTCL-NOS (PTCL) and ALCL (top). Expression levels of *IL17RC* compared to expression levels of *IL17RA*, *IL21R* and *IL6R* in normal lymph nodes (LN), PTCL-TFH, PTCL-NOS (PTCL) and ALCL (bottom).

**Supplementary Figure 3**

Expression of pMIG constructs in Ba/F3 cells and CD4+ T cells and generation of CARD11 knock-out Jurkat cells. **a** Western blot for TRAF3IP2 on lysates from CD4+ T cells transduced with pMIG-*TRAF3IP2*, pMIG-*FYN-TRAF3IP2* or pMIG-*FYNG2A-TRAF3IP2*. **b** Western blot for TRAF3IP2 in the cytosolic and membrane fractions of Ba/F3 cells transduced with empty pMIG vector, pMIG-*FYN-TRAF3IP2* or pMIG-*FYNG2A-TRAF3IP2*. **c** Western blot for TRAF3IP2 on lysates from Ba/F3 cells (top) and CD4+ T cells (bottom) transduced with pMIG-*FYN-TRAF3IP2* (FT) or pMIG-*FYN-TRAF3IP2∆T6* (FT∆T6). **d** Western blot for CARD11 on single-cell-derived Jurkat clones after electroporation with pX330 vector containing a sgRNA directed against *CARD11*. **e** NF-kB luciferase reporter activity in wild-type and *CARD11* knock-out Jurkat cells in basal conditions or after stimulation with PMA/ionomycin. *n* = 3 replicates per condition. Data are represented as mean ± SD. *p*-values were calculated with Sídák’s multiple comparisons test.

**Supplementary Figure 4**

Generation and phenotyping of *FYN-TRAF3IP2*-induced mouse lymphomas. **a** Transduction efficiency of HSPC 24 hours after retroviral transduction. **b** Quantification of GFP+ cells in the peripheral blood 7 weeks after the bone marrow transplant procedure with HPSC transduced with empty vector (EV), *FYN-TRAF3IP2* (FT) *or FYNG2A-TRAF3IP2* (FG2AT). *n* = 5 mice for EV, *n* = 10 mice for FT and *n* = 6 mice for FG2AT. *p*-values were calculated with Tukey’s multiple comparisons test. **c** Quantification of CD4+ T cells as a fraction of GFP- and GFP+ cells in the peripheral blood 7 weeks after the bone marrow transplant procedure. *n* = 5 mice per group. *p*-values were calculated with Sídák’s multiple comparisons test. **d** Representative flow cytometry plots for cell suspensions from the spleens of mice transplanted with HSPC transduced with empty vector, *FYN-TRAF3IP2* or *FYNG2A-TRAF3IP2*. *n* = 5 mice per group. **e** Representative images of immunofluorescent staining for GFP and TRAF3IP2 on lymph node sections from *FYN-TRAF3IP2*-induced lymphomas (*n* = 5 mice). Scalebars represent 20 µm. **f** Quantification of CD11b+ cells (left), CD4+ T cells (middle) and CD8+ T cells (right) in lymph node suspensions from mice transplanted with empty-vector-transduced (EV) cells, *FYN-TRAF3IP2*-transduced (FT) cells or *FYNG2A-TRAF3IP2*-transduced cells (FG2AT). *n* = 5 mice per group. *p*-values were calculated with Tukey’s post-hoc multiple comparisons test.

All data are represented as mean ± SD

**Supplementary Figure 5**

Transcriptional profiling of *FYN-TRAF3IP2*-driven lymphomas. **a** Heatmaps for the most significant differentially expressed genes in CD4+GFP+ lymphoma cells versus naive CD4+ T cells (left), CD4+GFP- stromal T cells (middle) and CD4+GFP+ *FYNG2A-TRAF3IP2*-expressing T cells (right). **b** Quantification (left) and representative immunofluorescent images (right) of the nuclear accumulation of RelB in GFP- stromal cells (*n* = 217 cells) and GFP+ lymphoma cells (*n* = 257 cells) in the lymph nodes from mice (*n* = 5) with *FYN-TRAF3IP2*-induced lymphomas. Scalebars represent 20 µm. Horizontal line and whiskers represent median and interquartile range respectively. *p*-values were calculated with the Mann-Whitney test. **c** Enrichment plots for a list of computationally predicted RelB target genes in lymphoma cells compared with naive CD4+ T cells (left), CD4+GFP- stromal T cells (middle) and CD4+GFP+ *FYNG2A-TRAF3IP2*-expressing T cells (right). **d** Heatmap representation of relative transcript abundance of Th2-, Th9- and Th17-related cytokines and cytotoxic markers in naive CD4+ T cells, CD4+GFP- stromal T cells, *FYN-TRAF3IP2*-expressing lymphoma cells and CD4+GFP+ *FYNG2A-TRAF3IP2*-expressing T cells. **e** Enrichment plots for a list of c-Jun target genes identified by ChIP-seq in lymphoma cells compared with naive CD4+ T cells (left), CD4+GFP- stromal T cells (middle) and CD4+GFP+ *FYNG2A-TRAF3IP2*-expressing T cells (right).

**Supplementary Figure 6**

Characterization of *KHDRBS1-LCK*-induced PTCL. **a** Western blot for LCK in Ba/F3 cells transduced with the indicated constructs. **b** Quantification of spleen weight, thymus weight and white blood cell (WBC) count in mice transplanted with HSPC transduced with empty pMIG vector (EV) or pMIG-*KHDRBS1-LCK*. *n* = 5 mice for EV, *n* = 1 mouse for KL. Data are represented as mean ± SD. *p*-values were calculated with unpaired two-tailed t-test. **c** Immunophenotype of GFP+ cells in the spleen, pleural fluid, thymus, peripheral blood and bone marrow of *KHDRBS1-LCK­*-induced PTCL.

**Supplementary Figure 7**

Overview of gating strategies for flow cytometry. **a** Gating strategy for Jurkat NF-kB GFP reporter cells related to figures 2d, 3d. **b** Gating strategy for intracellular flow cytometry experiments related to figures 2f-g, 3f, 4e, 9e-f. **c** Gating strategy for cell suspensions from mouse tissues related to figures 5d, 6a, 6c, 10c-d and supplementary figures 3b-d, 3f. **d** Gating strategy for CD19lo-int cells related to figure 6e.

**SUPPLEMENTARY TABLE LEGENDS**

**Supplementary Table 1**

Clinical, histopathological and genetic characteristics of the discovery cohort. M: male, F: female, IPI: international prognostic index, 0: absent, 1: present, na: not available.

**Supplementary Table 2**

Histopathological characteristics of the validation cohort.

**Supplementary Table 3**

Used primers.

**Supplementary Table 3**

| Name | Sequence |
| --- | --- |
| FYN-TRAF3IP2 breakpoint Fwd | CGAAAAGATGCTGAGCGACA |
| FYN-TRAF3IP2 breakpoint exon 8 Fwd | TGAAAGGAGACCATGTCAAACA |
| FYN-TRAF3IP2 breakpoint Rev | TTCTGATTCCTCTTCCGGGG |
| TRAF3IP2 EcoRI-Kozak-start | CCGGAATTCGCCACCATGAACCGAAGCATTCCTGTG |
| FYN-TRAF3IP2 EcoRI-Kozak-start | CCGGAATTCGCCACCATGGGCTGTGTGCAATGTAA |
| FYN(G2A)-TRAF3IP2 EcoRI-Kozak-start | CCGGAATTCGCCACCATGGCCTGTGTGCAATGTAAG |
| FYN-TRAF3IP2 stop-BamHI | CGCGGATCCTCACAAGGGAACCACCTGAA |
| FYN1-232 stop-BamHI | CGCGGATCCTCATGAGTAATGTTGTACAAGCTGCTG |
| FYN-TRAF3IP2 Q5SDM ∆T6 Fwd | gttgctgcaTCAGAACCATACCCAAGTC |
| FYN-TRAF3IP2 Q5SDM ∆T6 Rev | cgccacaggAATGCTTCGGTTCATTCTAG |
| gDNA FYN nested outer | GCAAGCTCAGCCATTCATCG |
| gDNA FYN nested inner | AGCTTTCAGTCTCAAGGGCA |
| gDNA TRAF3IP2 nested outer | GGGAAAGGCCTGAAGATGCT |
| gDNA TRAF3IP2 nested inner | CACGGGAGAGCAACTCTTCA |
| LCK EcoRI-Kozak-start | CCGGAATTCGCCACCATGGGCTGTGGCTGCAG |
| KHDRBS1-LCK breakpoint Fwd | GCTGACGGCAGAAATTGAGA |
| KHDRBS1-LCK breakpoint Rev | TGTTCCCCCTTCTCAAAGCC |
| KHDRBS1-LCK EcoRI-Kozak-start | CCGGAATTCGCCACCATGCAGCGCCGGGACGAC |
| KHDRBS1-LCK stop-XhoI | CCGCTCGAGTCAAGGCTGAGGCTGGTACTG |
| KHDRBS1-LCK Q5SDM K273R Fwd | GTGGCGGTGAgGAGCCTGAAG |
| KHDRBS1-LCK Q5SDM K273R Rev | CTTCGTGTGCCCGTTGTAG |
| SIN3A-FOXO1 breakpoint Fwd | GCCTGAGCTTCGTGAACAT |
| SIN3A-FOXO1 breakpoint Rev | ACTGTGATCCAGGGCTGTC |
| Trbv5 Fwd | GGAAACAGCACTCATGAACAC |
| Trbv1 Fwd | CTACAGACCCCACAGTGAC |
| Trbv26 Fwd | CAAGATATCTGGTGAAAGGGC |
| Trbv2 Fwd | AGTATCTAGGCCACAATGC |
| Trbv12-1/12-2/12-3 Fwd | CTCYTGGGAACAAGTTCAGC |
| Trbv19 Fwd | CACATGGTGATGGTGGCATC |
| Trbv29 Fwd | GAACAGGCCTTGTGGACATG |
| Trbv13-1/13-2/13-3 Fwd | TGKGWRCAAAACACATGGAGGC |
| Trbv17 Fwd | TGCAGCCACTTTTGTGGATAC |
| Trbv4 Fwd | AATTGCTGAAGATTATGTTTAGC |
| Trbv16 Fwd | GAGAGCAGAACCAACAAATGC |
| Trbv15 Fwd | GCAAGTCTCTTATGGAAGATGG |
| Trbv14 Fwd | GTTCCTTGACACAGTACTGTC |
| Trbv31 Fwd | GCTCAGACTATCCATCAATGG |
| Trbv20 Fwd | TTCTGGGGCCTGGCTGTG |
| Trbv3 Fwd | GAAGCAGGACACACAGGAC |
| Trbv18 Fwd | GCAGCTCTTTATGTTGCTGG |
| Trbv30 Fwd | TGTCCTCCTCTACCAAAAGC |
| Trbv21 Fwd | CTCTGGGGTTGTCCAGAATC |
| Trbc1/Trbc2 Rev | CTATAATTGCTCTCCTTGTAGG |
| Ciz Fwd | CCCATTTCGGCTCCCATGATT |
| Ciz Rev | GGTCTCGGTGTGTGACTTGGA |
| Arid5a Fwd | TCATGAAGGAGCGACACACG |
| Arid5a Rev | CCTGTCACCAGCTCATAGGC |
| Zc3h12a Fwd | AACTGGTTTCTGGAGCGAGG |
| Zc3h12a rev | CGAAGGATGTGCTGGTCTGT |
| Bcl2l1 Fwd | GCCTTTTTCTCCTTTGGCGG |
| Bcl2l1 Rev | TCCACAAAAGTGTCCCAGCC |
| CARD11 TS1 Fwd | CACCGGACGGCCTGATCACATCGG |
| CARD11 TS1 Rev | AAACCCGATGTGATCAGGCCGTCC |

**METHODS**

**Patient samples**

Patients samples for the discovery cohort were collected retrospectively from the tumor banks of the University Hospitals Leuven and the CHU Mont-Godinne and prospectively in the University Hospitals Leuven. For prospectively obtained samples, we obtained informed consent from all patients. All cases were reviewed by two hematopathologists (LM and TT).

Patient samples for the validation cohort were obtained from the T-cell lymphoma biobank (TENOMIC) of the Lymphoma Study Association (LYSA) and were reviewed by two hematopathologists (PG en LdL). The study was approved by the Ethics Committee UZ/KU Leuven (S62100).

**Mice**

We used 6- to 10-week-old C57BL/6J mice for the isolation of primary T cells and bone marrow transplant experiments. Mouse experiments were approved and supervised by the KU Leuven ethical committee and conducted according to EU legislation (Directive 2010/63/EU).

**RNA extraction, cDNA synthesis and qRT-PCR**

RNA from clinical samples was extracted from 4 cryosections, each 10 µm thick. Briefly, sections were resuspended in Trizol (Thermo Fisher Scientific). After addition of chloroform, RNA was precipitated from the aqueous phase with 100% ethanol. RNA was washed and eluted with the RNeasy Mini Kit (Qiagen) according to the manufacturer’s instructions. Concentrations and purity were measured with the NanoDrop 2000 (Fisher Scientific). RNA integrity was measured with the Bioanalyzer 2100 system using the RNA 6000 Nano Kit (both from Agilent). Samples with an RNA integrity number > 8 were retained for RNA sequencing. cDNA synthesis was performed using SuperScript IV (Thermo Fisher Scientific). To detect fusion transcripts, cDNA was amplified with GoTaq polymerase (Promega) using the primers listed in **Supplementary Table 3**.

Mouse tissue was disrupted in Trizol (Thermo Fisher Scientific) with the TissueLyser LT (Qiagen) at 50 Hz for 4 minutes. Supernatants were collected. After addition of chloroform, RNA was precipitated from the aqueous phase with 100% ethanol. RNA was washed and eluted with the RNeasy Mini Kit (Qiagen) according to the manufacturer’s instructions. Concentrations and purity were measured with the NanoDrop 2000 (Fisher Scientific). cDNA synthesis was performed using GoScript (Promega). T cell receptor clonality was verified on cDNA with GoTaq polymerase (Promega) using the primers listed in **Supplementary Table 3**. PCR products were loaded on the QIAxcel Advanced System (Qiagen).

RNA was extracted from cultured cells using the Maxwell RSC simplyRNA Cells purification kit (Promega). cDNA synthesis was performed using GoScript (Promega) and qRT-PCR was performed using the GoTaq qRT-PCR master mix (Promega) on the ViiA7 Real Time PCR system (Applied Biosystem). Primers used for qRT-PCR are listed in **Supplementary Table 3**. qRT-PCR data were analyzed with the geNorm algorithm in the R package SLqPCR (<https://www.bioconductor.org/packages/release/bioc/html/SLqPCR.html>) in R version 3.6.1.

**RNA sequencing**

For clinical samples, libraries were made with the TruSeq Stranded mRNA Library Prep Kit (Illumina). We used 1 µg RNA as input. Libraries were prepared per manufacturer’s instructions. Libraries were pooled and sequenced on an S2 flow cell on a NovaSeq 6000 system (both Illumina) in 2x100 bp mode to an average depth of 200 million reads per sample.

For mouse cells, libraries were made with the QuantSeq 3’ mRNA-Seq Library Prep Kit (Lexogen). We used 20-100 ng RNA as input. Libraries were prepared per manufacturer’s instructions. Libraries were pooled and sequenced on a HiSeq 4000 system (Illumina) in 1x50 bp mode.

**Bioinformatics**

Raw sequencing data from the Illumina sequencer was demultiplexed and converted to the fastq file format with Illumina’s bcl2fastq software. For anaplastic large cell lymphoma samples and normal lymph nodes1, we used data from publicly accessible repositories. Quality of fastq files was assessed with FastQC v0.11.9. RNA-sequencing data was first cleaned (i.e. removal of adapters and low-quality reads) with fastq-MCF (ea-utils), again followed by quality control with fastQC. Chimeric reads were identified with FusionCatcher (<https://github.com/ndaniel/fusioncatcher>). Reads were aligned with HISAT22 to their respective genomes, either Homo Sapiens (GRCh38/hg38) or Mus Musculus (mm10). HTSeq-count3 was used to count the number of reads per gene. Differential gene expression analysis was performed with the R-package DESeq24, using R version 3.6.1. Gene set enrichment analysis was performed with the Broad Institute GSEA software. Analysis of cis-regulatory features associated with co-expressed genes was performed with i-cisTarget5.

**Genomic DNA**

Genomic DNA from clinical samples was extracted with the DNEasy kit (Qiagen) according to the manufacturer’s instructions. PCR on genomic DNA was performed with Q5 polymerase (New England Biolabs) and the primers listed in **Supplementary Table 3**.

**Plasmids and vectors**

RNA from patient samples and Jurkat cells were retrotranscribed with SuperScript IV reverse transcriptase (Thermo Fisher Scientific) using oligo(dT)15 primers (Promega). *FYN1-232*, *TRAF3IP2*, *FYN-TRAF3IP2*, *FYNG2A-TRAF3IP2*, *LCK* and *KHDRBS1-LCK* were cloned from cDNA with Q5 polymerase (New England Biolabs) and the primers listed in **Supplementary Table 3**. Blunt-ended cDNA amplicons were ligated in the pJET1.2 cloning vector (Thermo Fisher Scientific) and verified with Sanger sequencing (Eurofins Genomics). Validated coding sequences were cloned from the pJET1.2 cloning vector to the multiple cloning site of the pMSCV-IRES-GFP II retroviral expression vector (Addgene #52107) or pMSCV-IRES-mCherry retroviral expression vector (Addgene #52114) and verified with Sanger sequencing (Eurofins Genomics).

*FYN-TRAF3IP2∆T6 and KHDRBS1-LCKK273R* were generated with the Q5 site-directed mutagenesis kit (New England Biolabs) according to manufacturer’s instructions with primers listed in **Supplementary Table 3**.

The pGreenfire1-NF-kB luciferase/GFP reporter lentiviral transfer plasmid was ordered from System Biosciences (TR012PA-P).

**Cell culture**

Ba/F3 cells were cultured in RPMI 1640 supplemented with 10% fetal bovine serum (FBS) and IL-3 (1 ng/ml; Peprotech). For transformation assays, cells were washed 3 times with PBS to remove all IL-3 and resuspended in RPMI 1640 supplemented with 10% FBS at a density of 105 – 1.5x 105 cells/ml. Cell growth and GFP percentage were monitored with a MACSQuant Vyb cytometer (Miltenyi).

Jurkat cells were cultured in RPMI 1640 with 20% FBS. For anti-CD3 stimulation, Jurkat cells were resuspended in chilled PBS with 1 µg/ml anti-CD3 (OKT3, Biolegend) at a density of 106 cells/ml and incubated on ice for 20 minutes. Cells were then resuspended in full medium with 10 µg/ml goat anti-mouse IgG (Biolegend) at cell densities of 107/ml. After a 10-minute incubation at room temperature, cells were diluted to a final concentration of 106/ml in full medium and incubated overnight. For phorbol 12-myristate 13-acetate (PMA) stimulation, Jurkat NF-kB luciferase reporter cells were seeded in 200 µl RPMI 1640 with 10% FBS at a density of 106 cells/ml with or without PMA/ionomycin (50 nM PMA, 13.4 µM ionomycin; Thermo Fisher Scientific). After 6 hours the treatment was stopped.

Primary T cells were isolated from spleens of wild type C57BL/6J mice with the MojoSort Mouse CD4 Naive T cell isolation kit or Mouse CD3 T Cell Isolation Kit (both BioLegend). Briefly, spleens were smashed on a 40 µm cell strainer. After red blood cell lysis, T cells were purified according to the manufacturer’s instructions. Purified cells were resuspended in T cell medium (RPMI 1640 supplemented with 10% FBS, 2mM glutamine, non-essential amino acids solution (Gibco), 1 mM sodium pyruvate, 50 µM 2-mercaptoethanol, Primocin (Invivogen) and IL-2 (10 ng/ml; Peprotech)). T cells were activated on anti-CD3 coated plates (clone 145-2C11, 2 µg/ml in PBS, BioLegend) in T cell medium supplemented with anti-CD28 (clone 37.51, 2 µg/ml, BioLegend) for 24 hours. After 24 hours, T cells were transferred to tissue culture treated plates and cultured in T cell medium. T cells were split daily, to maintain a density of 1-2x 106 cells/ml. After 7 days, T cells were briefly restimulated with soluble anti-CD3 antibody. For IL-17 stimulation, cells were cultured overnight in T cell medium supplemented with IL-17A (100 ng/µl; Peprotech). For anti-CD3 stimulation, T cells were resuspended in RPMI 1640 without FBS with 10 µg/ml anti-CD3 (145-2C11, Biolegend) or Armenian hamster IgG isotype control (eBioscience) at a density of 107 cells/ml and incubated on ice for 15 minutes in polypropylene FACS tubes (BD). For stimulation, tubes were transferred to a water bath at 37°C. Treatment was stopped by the addition of fixation buffer (after 1 minute for phospho-ZAP70, after 15 minutes for all other analyses). For experiments with dasatinib, T cells were incubated in RPMI 1640 with 50 nM dasatinib (Selleckchem) or DMSO at 37°C for 15 minutes prior to stimulation with anti-CD3 antibody.

**CRISPR/Cas9 genome editing**

To generate *CARD11* knock-out Jurkat cells, we cloned oligos complementary to the target site (**Supplementary Table 3**) in the pX330 vector (Addgene #42230) after digestion with BbsI (Thermo Fisher Scientific). We electroporated the pX330 plasmid in Jurkat cells in serum-free RPMI 1640 medium using the Gene Pulser Xcell™ system (Biorad). Immediately after electroporation, cells were transferred to 2 ml pre-warmed RPMI 1640 medium supplemented with 20% FBS. After 48 hours, single cells were cultured in 96-well plates. Clones that grew out, were screened with Western blot. All experiments with *CARD11* knock-out Jurkat cells were reproduced in clones 4 and 6 (**Supplementary Fig. 3d**).

**Virus production and transduction**

Ecotropic retrovirus was produced In 293T cells transfected with the appropriate retroviral expression vector and the pIK6.1MCV.ecopac packaging plasmid using GeneJuice transfection reagent (Merck Millipore). 24 hours after transfection, the medium was changed to RPMI 1640 with 10% FBS. 24 hours later, the supernatant with viral particles was harvested. One ml of viral supernatant was added to 106 Ba/F3 cells in 1 ml of medium and cells were transduced overnight in the presence of polybrene (8 µg/ml). Primary T cells were transduced as reported previously6.

VSV-G pseudotyped retrovirus was produced in 293T cells transfected with retroviral expression vector, gag-pol (Addgene #14887) and pCMV-VSV-G plasmid (Addgene #8454) using Genejuice (Merck Millipore). After 6 hours, the medium was changed to RPMI 1640 with 10% FBS. 48 hours after transfection, supernatant carrying viral particles was harvested. Jurkat cells were transduced on retronectin-coated plates (Takara) by spinfection.

Luciferase/GFP dual NF-kB reporter lentivirus was produced in 293T cells transfected with pGreenFire1-NF-kB luciferase/GFP plasmid, psPAX2 (Addgene #12260) and pCMV-VSV-G plasmid (Addgene #8454) using GeneJuice (Merck Millipore). After 6 hours, the medium was changed to RPMI 1640 with 20% FBS. Supernatant carrying the viral particles was harvested 48 hours after transfection and concentrated on a 20% sucrose gradient by ultracentrifugation. Jurkat cells were transduced on retronectin-coated plates (Takara) by spinfection.

**Murine bone marrow transplantation**

C57BL/6J mice were purchased from Charles River Laboratories. Bone marrow cells were harvested from femur and tibia of male mice. Lineage negative cells were enriched (EasySep Mouse Hematopoietic Progenitor Cell Isolation Kit, STEMCELL Technologies) and cultured overnight in RPMI 1640 supplemented with 20% FBS, IL-3 (10 ng/ml; Peprotech), IL-6 (10 ng/ml; Peprotech), SCF (50 ng/ml; Peprotech), and Primocin (Invivogen). The following day, cells were transduced by spinoculation (90 minutes at 2,500 rpm) with viral supernatant and 8 μg/mL polybrene and syngeneic female recipient mice were sublethally irradiated (5 Gy). The following day, the cells were washed in PBS and injected (1 × 106 cells/ 0.3 ml) into the lateral tail vein of sublethally irradiated syngeneic female recipient mice. Mice were housed in individually ventilated cages and monitored daily.

**Immunoblotting and co-immunoprecipitation**

Cells were lysed in Cell Lysis buffer (Cell Signaling). Tissues were homogenized with a TissueLyserLT (Qiagen). Cytoplasmic and membrane fractions were obtained with the Mem-PER Plus Membrane Protein Extraction Kit (Thermo Fisher Scientific) according to the manufacturer’s instructions and the addition of additional wash steps with PBS.

For immunoprecipitation of TRAF6, Dynabeads Protein G (Thermo Fisher Scientific) were pre-coated with anti-TRAF6 antibody (Cell Signaling, #8028S) and IP was performed according to the manufacturer’s instructions. For immunoprecipitation of TRAF3IP2, Dynabeads sheep anti-rat IgG (Thermo Fisher Scientific) were mixed with lysates, anti-TRAF3IP2 antibody (Thermo Fisher Scientific, #14-4040-82) and 5% normal donkey serum. The beads-lysate mixtures were incubated over night at 4°C with gentle rotation. After thorough washing, protein complexes were eluted in denaturing NuPAGE LDS sample buffer (Thermo Fisher Scientific) and loaded on the gel.

The proteins were separated on NuPAGE NOVEX Bis-Tris 4%–12% gels (Life Technologies) and transferred to PVDF membranes. Subsequent Western blot analysis was performed using antibodies listed in reporting summary. Western blot detection was performed with secondary antibodies conjugated with horseradish peroxidase (GE Healthcare). Bands were visualized using a cooled charge-coupled device camera system (ImageQuant LAS-4000; GE Health Care).

**Drug treatment**

Ba/F3 cells, MACS-sorted naive CD4+ T cells or FACS-sorted CD4+GFP+ lymphoma cells were seeded in 96-well plates. Ba/F3 cells were cultured in RPMI 1640 with 10% FBS with or without IL-3. T cells were cultured in T cell medium. Compounds were dissolved in DMSO and added in a randomized fashion using a D300e digital dispenser (Tecan). Cell proliferation was measured at baseline and after 24 hours (Ba/F3) or 48 hours (lymphoma and T cells) using the ATPlite luminescence system (PerkinElmer) on a Victor multilabel plate reader (PerkinElmer). After subtraction of the baseline signal, results were normalized to the DMSO control signal.

**Luciferase**

Jurkat NF-kB luciferase reporter cells were seeded in 200 µl RPMI 1640 with 10% FBS at a density of 106 cells/ml with or without phorbol 12-myristate 13-acetate (PMA)/ionomycin (50 nM PMA, 13.4 µM ionomycin; Thermo Fisher Scientific). After 6 hours, cells were washed in PBS and lysed in 30 µl passive lysis buffer (Promega) with gentle agitation. After 20 minutes, 20 µl of lysate was transferred to a new plate and loaded on a Victor multilabel plate reader (PerkinElmer). With the dispenser, 100 µl of Luciferase Assay Reagent II (Promega) was added and luciferase signal was measured well per well.

**Flow cytometry**

For surface staining, single cell suspensions were blocked with unconjugated CD16/32 antibody and stained with Fixable viability dye in staining buffer (PBS with 2% FBS) for 10 minutes protected from light at room temperature. Next, cells were washed with stain buffer. Cells were resuspended in staining buffer with the appropriate antibody dilutions for 30 minutes at 4°C protected from light. For the detection of cytosolic proteins, cells were fixed with room-temperature IC fixation buffer and permeabilized with eBioscience Permeabilization buffer (both from Thermo Fisher Scientific). For the detection of phosphorylated cytosolic proteins, cells were fixed with room-temperature IC fixation buffer and permeabilized with ice-cold methanol. For the detection of phosphorylated transcription factors, cells were prepared with the Transcription Factor Buffer set (BD Biosciences) according to the manufacturer’s instructions. For the detection of BCL6, viable CD4+GFP+ lymphoma cells were first sorted (MA900 cell sorter, Sony Biotechnology). For the detection of TdT, viable GFP+ lymphoma cells were first sorted (S3 cell sorter, Biorad). Sorted cells were processed with the FoxP3 transcription factor staining buffer set (Thermo Fisher Scientific) according to the manufacturer’s protocol. Antibodies and dilutions are listed in **Supplementary Table 4**. Data were acquired on Fortessa X-20, FACSCanto II or FACSVerse cell analyzers (all from BD Biosciences). Data were analyzed with FlowJo version 10.6 (BD Biosciences).

CD4+GFP+ lymphoma cells, CD4+GFP- stromal cells from *FYN-TRAF3IP2*-driven lymphomas and CD4+GFP+ *FYNG2A-TRAF3IP2*-expressing cells were sorted with an S3 cell sorter (Biorad) prior to RNA-seq.

Gating strategies are summarized in **Supplementary Figure 7**.

**Histology and immunofluorescence staining**

For the membrane staining of FYN-TRAF3IP2 in 293T cells, we coated cover slips with poly-L-lysine. 293T cells were seeded on top of the cover slips in RPMI 1640 with 10% FBS. After 6 hours, cells were transfected with empty pMIG vector or pMIG constructs encoding *TRAF3IP2*, *FYN-TRAF3IP2* or *FYNG2A-TRAF3IP2* using GeneJuice transfection reagent (Merck Millipore). After 12 hours, the medium was replaced with RPMI 1640 with 10% FBS. 36 hours later, cells were fixed for 20 minutes with 4% paraformaldehyde in PBS at room temperature. Next, cells were blocked in staining buffer (4% BSA, 0.1% digitonin in PBS) for 2 hours at room temperature. After blocking, cover slips were carefully removed from the plates and stained over night at 4°C with primary anti-TRAF3IP2 antibody (Thermo Fisher Scientific, #14-4040-82) diluted 1:200 in staining buffer. The next day, cover slips were washed with staining buffer followed by staining with secondary fluorochrome-conjugated antibodies diluted in staining buffer for 1 hour at room temperature. Finally, cover slips were washed with PBS, counterstained with DAPI and mounted with ProLong Gold Antifade mountant (Thermo Fisher Scientific, P36930). For the membrane staining on GFP-sorted primary T cells, 400,000 sorted cells were loaded in cytospin columns (Hettich) and spun down for 6 minutes at 400*g* on glass slides. Cells were fixed with 4% paraformaldehyde in PBS for 20 minutes at room temperature. Further processing was identical to the membrane staining protocol in 293T cells.

Mouse tissues were fixed over night at 4°C in 10% neutral buffered formalin (Sigma). Tissues were transferred to ethanol 70% followed by paraffin embedding. 4 µm sections were mounted on glass slides. Antigen retrieval was performed as previously described7. For immunohistochemistry, endogenous peroxidases were blocked with Dako REAL peroxidase-blocking solution (Agilent). Slides were blocked for 30 minutes at room temperature with 10% donkey serum diluted in PBS. Slides were stained over night at 4°C with the appropriate antibody in Dako REAL antibody diluent (Agilent) supplemented with 5% donkey serum. The next day, slides were washed with Dako Omnis wash buffer (Agilent) and stained with fluorochrome-conjugated secondary antibodies diluted in Dako REAL antibody diluent (Agilent). Slides were then washed, followed by a counterstain with DAPI. Slides were washed with PBS and mounted with ProLong Gold Antifade mountant (Thermo Fisher Scientific, P36930). For immunohistochemistry, slides were stained with Dako EnVision+ Dual Link System (DAB+) (Agilent).

**Imaging**

Immunofluorescence images were acquired using the SP8x confocal microscope (Leica). H&E slides and immunohistochemistry slides were imaged with a conventional light microscope (Leica) or a Vectra Polaris slide scanner (Akoya Biosciences).

**Image analysis**

All image analysis was done with CellProfiler software8. For all analyses, images were segmented based on the DAPI channel. For analysis of membrane staining, cells were divided in bins and the integrated signal intensity was measured in every bin and expressed as a fraction of integrated signal intensity over the entire cell mask. For the analysis of nuclear RELA accumulation, cells were classified as GFP-positive or GFP-negative based on the GFP signal in each individual segment. Next, we measured the NF-kB signal intensity within the DAPI masked region, shrunk by 2 pixels to avoid interference from the cytoplasmic signal at the nuclear rim. We used the lowest quartile intensity signal to classify cells based on their nuclear NF-kB signal. For the analysis of nuclear RELB accumulation, cells were classified as RELB-positive or RELB-negative based on the RELB signal in each individual segment. Subsequently RELB-positive cells were classified as GFP-positive or -negative. RELB integrated signal intensity was measured over the nuclear mask and the cell mask after subtraction of the background signal (mean RELB signal in the inverted cell mask). For the quantification of BCL-XL, BCL-XL integrated signal intensity was measured over the cell mask after subtraction of the background signal and normalized to cell area.

**Statistical analysis**

Statistical analysis and graphical representation were performed with Prism version 9 (GraphPad) and the R language (version 3.6.1). All analyses and images are representative of at least two independent experiments. Unless stated differently, all graphs use the mean as a measure of central tendency and the standard deviation as a measure of variation. For *in vitro* assays, we analyzed at least 3 biological replicates per condition. For qRT-PCR data, every data point represents the average of 3 technical replicates of a single biological replicate. Boxplots were made with the R package ggplot2. The lower and upper hinges correspond to the first and third quartiles, respectively. The upper whisker extends from the hinge to the largest value no further than 1.5 times the interquartile range (IQR) from the hinge. The lower whisker extends from the hinge to the smallest value no further than 1.5 times the IQR from the hinge. Data beyond the end of the whiskers are outlying.

**DATA AVAILABILITY**

Raw sequence data from clinical specimens has been deposited in the European Genome-Phenome Archive (accession EGAS00001004646 for 3 PTCL-TFH cases, accession EGAS00001005015 for 15 PTCL-NOS cases). Raw sequence data from murine CD4+ T cells is available in the European Nucleotide Archive (accession PRJEB42764).

**SUPPLEMENTAL REFERENCES**

1. Uhlen, M. *et al.* Proteomics. Tissue-based map of the human proteome. *Science* **347**, 1260419 (2015).

2. Kim, D., Paggi, J.M., Park, C., Bennett, C. & Salzberg, S.L. Graph-based genome alignment and genotyping with HISAT2 and HISAT-genotype. *Nat Biotechnol* **37**, 907-915 (2019).

3. Anders, S., Pyl, P.T. & Huber, W. HTSeq--a Python framework to work with high-throughput sequencing data. *Bioinformatics* **31**, 166-9 (2015).

4. Love, M.I., Huber, W. & Anders, S. Moderated estimation of fold change and dispersion for RNA-seq data with DESeq2. *Genome Biol* **15**, 550 (2014).

5. Herrmann, C., Van de Sande, B., Potier, D. & Aerts, S. i-cisTarget: an integrative genomics method for the prediction of regulatory features and cis-regulatory modules. *Nucleic Acids Res* **40**, e114 (2012).

6. Lee, J., Sadelain, M. & Brentjens, R. Retroviral transduction of murine primary T lymphocytes. *Methods Mol Biol* **506**, 83-96 (2009).

7. Scalia, C.R., Gendusa, R. & Cattoretti, G. A 2-Step Laemmli and Antigen Retrieval Method Improves Immunodetection. *Appl Immunohistochem Mol Morphol* **24**, 436-46 (2016).

8. McQuin, C. *et al.* CellProfiler 3.0: Next-generation image processing for biology. *PLoS Biol* **16**, e2005970 (2018).
