# Supplementary material for: FYN-TRAF3IP2 and KHDRBS1-LCK hijack T cell receptor signaling in peripheral T cell lymphoma, not otherwise specified
Source: Research Square preprint supplement (doi:10.21203/rs.3.rs-200114/v1), 2021-02-05
Supplement: Supplementary file 3 [file 7ef48373a025a91ddc8345b6.xlsx]

## Sheet: Supplementary table 1
Case	Age	Gender	Stage	IPI	Prior therapy	CD3	CD4	CD8	GZMB	PFN	TIA1	CD30	ICOS	PD1	EBV	TET2	IDH2	DNMT3A	RHOA	FYN-TRAF3IP2	KHDRBS1-LCK	VAV1-MYO1F	TBL1XR1-TP63	SIN3A-FOXO1
PTCL1	69	F	4	5	0	1	1	0	na	na	1	1	0	0	0	0	0	0	0	0	0	0	0	0
PTCL2	24	M	4	2	0	1	1	0	na	na	na	0	1	0	na	0	0	0	0	1	0	0	0	0
PTCL3	64	M	3	3	0	1	1	0	na	na	na	0	0	0	0	0	0	0	0	0	0	1	0	0
PTCL5	80	F	3	3	0	0	1	0	1	1	0	1	na	na	0	p.S1290L	0	0	0	0	0	0	0	0
PTCL9	70	M	2	1	0	1	1	0	0	0	0	1	na	0	na	0	0	0	0	0	0	0	0	0
PTCL11	66	F	1E	1	1	1	1	0	0	0	0	1	0	1	0	0	0	0	0	0	0	0	0	0
PTCL13	65	F	3	2	0	1	0	0	0	0	1	0	na	0	0	p.C1289R	p.R172S	0	0	0	0	0	0	0
PTCL14	74	M	3	2	0	1	0	1	1	1	1	0	na	na	0	p.Q196X, p.Q1034X	0	0	0	0	0	0	0	1
PTCL16	62	F	4	5	0	1	1	0	na	na	na	0	0	0	0	p.E1483X	0	p.D712fs	p.F30S	0	0	0	0	0
PTCL17	74	M	3	2	0	1	1	0	0	0	0	1	na	0	0	0	0	0	0	0	1	0	0	0
PTCL18	63	M	4	3	1	1	1	0	na	na	na	0	0	0	0	p.R1216X	0	0	0	0	0	0	0	0
PTCL19	60	F	4	4	0	1	0	0	na	1	na	1	na	na	0	0	0	p.G413fs	0	0	0	0	0	0
PTCL20	49	M	2	0	0	1	1	0	na	na	na	0	0	0	0	0	0	p.S337P	0	0	0	0	0	0
PTCL21	62	M	4	2	0	1	1	0	na	na	1	0	na	na	0	0	0	0	0	0	0	0	0	0
PTCL22	44	F	4	2	0	1	1	1	na	na	0	1	na	na	na	0	0	0	0	0	0	0	1	0
FTCL4	71	F	3	2	0	1	1	0	na	na	na	na	1	1	1	p.Q769X, p.W1219fs	p.R172K	p.R771P	p.G17V	1	0	0	0	0
FTCL5	58	F	3S	1	0	1	1	0	na	na	0	na	1	1	1	p.N1714fs, p.K1752fs	p.R172S	0	p.G17V	0	0	0	0	0
FTCL6	76	F	3S	4	0	1	1	0	na	na	na	na	1	1	1	p.Y1294C	p.R172M	0	p.G17V	0	0	0	0	0
